# Supplementary material for: Grapevine Shoot Extract Rich in Trans-Resveratrol and Trans-ε-Viniferin: Evaluation of Their Potential Use for Cardiac Health
Source: MDPI journal article supplement (doi:10.3390/foods12234351), 2023-12-02
Supplement: s1 [file s1]

**Table S1.** Primer sequences used for semi-quantitative RT-PCR reactions.

| Gene      | Forward (5'-3')                | Reverse (5'-3')                |
|-----------|--------------------------------|--------------------------------|
| Bax       | 5'-CGGCGAATTGGAGATGAACTGG-3'   | 5'-CTAGCAAAGTAGAAGAGGGCAACC-3' |
| Caspase-3 | 5'-GTGGAACTGACGATGATATGGC-3'   | 5'-CGCAAAGTGAAGTGGATGAACC-3'   |
| Bcl-2     | 5'-TGTGGATGACTGACTACCTGAACC-3' | 5'-CAGCCAGGAGAAATCAAACAGAGG-3' |

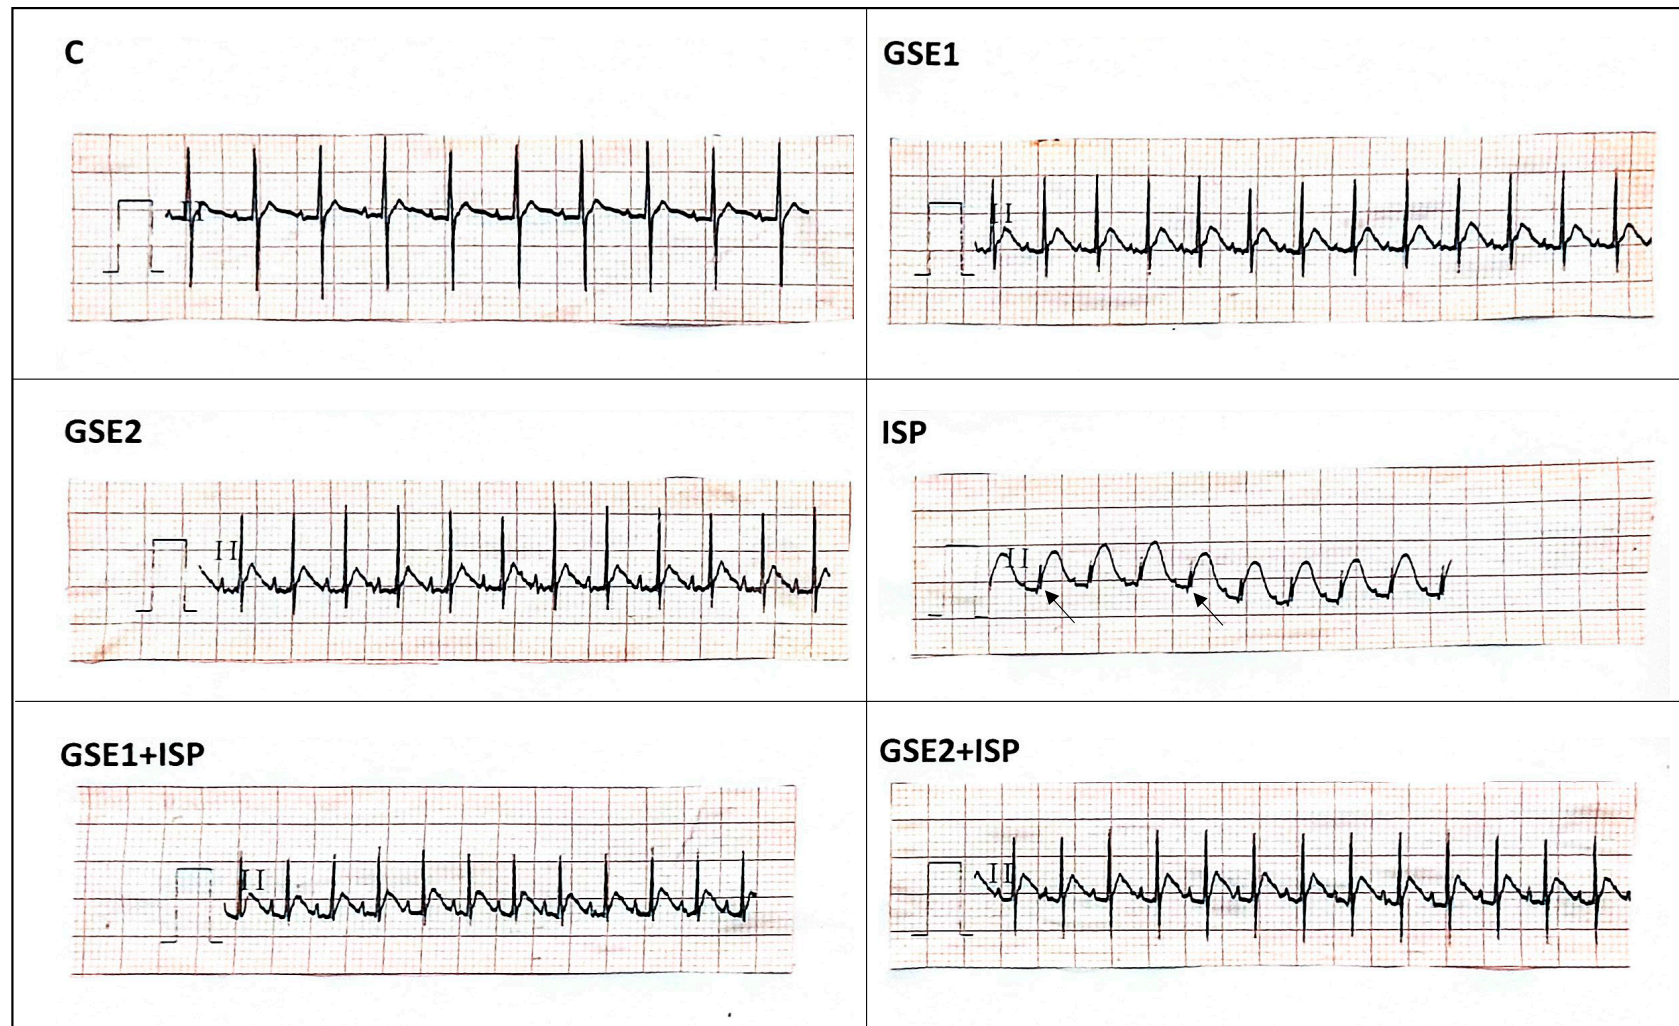

**Figure S1.** Electrocardiogram (ECG) pattern of control (C) and experimental animals. The control group showed a normal ECG pattern. The isoproterenol (ISP)-treated group showed pathological changes as ST-segment elevation (Pardee Wave) (arrow). GSE: grapevine shoot extract.
